# Supplementary material for: An Atlas of Genomic Resources for Studying Rosaceae Fruits and Ornamentals
Source: Front Plant Sci. 2021 Apr 1;12:644881. doi: 10.3389/fpls.2021.644881 (PMC8047320; doi:10.3389/fpls.2021.644881)
Supplement: Supplementary Table 1 — A comprehensive list of Rosaceae genomes and relevant information. [file Table_1.xlsx]

## Sheet: Table S1
Table S1 List of Rosaceae species and corresponding genome resources
Species	Ploidy	Common Name	Variety	Year of First Publication	Type	Transcriptome Access*	Reference	Associated Website URL	GDR	NCBI Genome	Dicots PLAZA 4.5	Phytozome v13	EnsemblPlants
Malus baccata	2n = 2x =34	Siberian crab apple	Shandingzi	2019	Genome	SRR8156047-SRR8156050	Chen et al., 2019	.	Malus baccata v1.0 (https://www.rosaceae.org/species/malus_baccata/genome_v1.0)	Malus_baccata_v1.0 (https://www.ncbi.nlm.nih.gov/assembly/GCA_006547085.1/)	.	.	.
Malus domestica	2n = 2x =34	Apple	Golden Delicious	2010	Genome	.	Velasco et al., 2010	.	Malus x domestica v1.0 (https://www.rosaceae.org/species/malus/malus_x_domestica/genome_v1.0), Malus x domestica v3.0.a1 (https://www.rosaceae.org/species/malus/malus_x_domestica/genome_v3.0.a1)	MalDomGD1.0 (https://www.ncbi.nlm.nih.gov/assembly/GCA_000148765.2/)	.	.	.
Malus domestica	2n = 2x =34	Apple	Golden Delicious	2014	Transcriptome	SRX392051	Bai et al., 2014	.	.	.	.	.	.
Malus domestica	2n = 2x =34	Apple	Golden Delicious	2016	Genome	SRP067376	X. Li et al., 2016	.	.	.	https://bioinformatics.psb.ugent.be/plaza/versions/plaza_v4_5_dicots/organism/view/Malus+domestica	.	.
Malus domestica	2n = 2x =34	Apple	Golden Delicious doubled haploid (GDDH13)	2017	Genome	PRJNA191060	Daccord et al., 2017	https://iris.angers.inra.fr/gddh13/	Malus x domestica Genome (GDDH13 v1.1) (https://www.rosaceae.org/species/malus/malus_x_domestica/genome_GDDH13_v1.1)	ASM211411v1 (https://www.ncbi.nlm.nih.gov/assembly/GCF_002114115.1/)	.	https://phytozome-next.jgi.doe.gov/info/Mdomestica_v1_1	https://plants.ensembl.org/Malus_domestica_golden/Info/Index
Malus domestica	2n = 2x =34	Apple	Hanfu anther-derived homozygous line HFTH1	2019	Genome	SRX4557795-SRX4557802, SRX4557790, and SRX4557791	L. Zhang et al., 2019	.	Malus x domestica HFTH1 v1.0 (https://www.rosaceae.org/species/malus_x_domestica_HFTH1/genome_v1.0)	ASM411538v1 (https://www.ncbi.nlm.nih.gov/assembly/GCA_004115385.1/)	.	.	.
Pyrus betulifolia	2n = 2x =34	Birchleaf pear	Shanxi Duli	2019	Genome	PRJNA529328	X. Dong et al., 2020	.	Pyrus betulifolia Genome v1.0 (https://www.rosaceae.org/species/pyrus_betulifolia/genome_v1.0)	ASM784424v1 (https://www.ncbi.nlm.nih.gov/assembly/GCA_007844245.1/)	.	.	.
Pyrus bretschneideri	2n = 2x =34	Chinese white pear	Dangshansuli	2012	Genome	.	Wu et al., 2013	http://peargenome.njau.edu.cn/	.	Pbr_v1.0 (https://www.ncbi.nlm.nih.gov/assembly/GCF_000315295.1/)	https://bioinformatics.psb.ugent.be/plaza/versions/plaza_v4_5_dicots/organism/view/Pyrus+bretschneideri	.	.
Pyrus bretschneideri	2n = 2x =34	Chinese white pear	.	2018	Genome re-assembly	.	Xue et al., 2018	http://genedenovoweb.ticp.net:81/pear/	Pyrus bretschneideri v1.1 genome (https://www.rosaceae.org/species/pyrus_bretschneideri/genome_v1.1)	.	.	.	.
Pyrus communis	2n = 2x =34	European pear	Bartlett	2014	Genome	PRJEB5264	Chagné et al., 2014	.	Pyrus communis v1.0 draft genome (https://www.rosaceae.org/species/pyrus/pyrus_communis/genome_v1.0)	.	.	.	.
Pyrus communis	2n = 2x =34	European pear	Bartlett doubled haploid	2019	Genome	.	Linsmith et al., 2019	.	Pyrus communis Bartlett DH Genome v2.0 (https://www.rosaceae.org/analysis/340)	.	.	.	.
Pyrus pyrifolia	2n = 2x =34	Chinese pear	Hosui	2019	Transcriptome	PRJDB8107	Koshimizu et al., 2019	http://plantomics.mind.meiji.ac.jp/nashi	.	.	.	.	.
Pyrus ussuriensis x communis	2n = 2x =34	Harbin x European pear	Zhongai 1	2019	Genome	PRJNA494996	Ou et al., 2019	.	Pyrus ussuriensis x communis Genome v1.0 (https://www.rosaceae.org/species/pyrus_ussuriensis/genome_v1.0)	ASM893209v1 (https://www.ncbi.nlm.nih.gov/assembly/GCA_008932095.1/)	.	.	.
Eriobotrya japonica	2n = 2x =34	Loquat	Seventh Star	2020	Genome	PRJNA579885	S. Jiang et al., 2020	.	.	.	.	.	.
Prunus armeniaca	2n =2x = 16	Apricot	Chuanzhihong	2019	Genome	CNP0000755 (CNSA of CNGBdb)	F. Jiang et al., 2019	.	Prunus armeniaca Genome v1.0 (https://www.rosaceae.org/species/prunus_armeniaca/genome_v1.0)	.	.	.	.
Prunus armeniaca	2n =2x = 16	Apricot	Rojo Pasion	2020	Genome	PRJEB37669	Campoy et al., 2020	.	.	pruArmRojPasHapCUR (https://www.ncbi.nlm.nih.gov/assembly/GCA_903112645.1/), pruArmRojPasHapORARED (https://www.ncbi.nlm.nih.gov/assembly/GCA_903114435.1/)	.	.	.
Prunus avium	2n =2x = 16	Sweet cherry	Satonishiki	2017	Genome	PRJDB4877	Shirasawa et al., 2017	http://cherry.kazusa.or.jp/	Prunus avium Genome v1.0.a1 (https://www.rosaceae.org/species/prunus_avium/genome_v1.0.a1)	PAV_r1.0 (https://www.ncbi.nlm.nih.gov/assembly/GCF_002207925.1/)	.	.	https://plants.ensembl.org/Prunus_avium/Info/Index
Prunus avium	2n =2x = 16	Sweet cherry	Hongmanao	2018	Genome	PRJNA489346	.	.	.	HMN_1.0 (https://www.ncbi.nlm.nih.gov/assembly/GCA_003946875.1/)	.	.	.
Prunus avium	2n =2x = 16	Sweet cherry	Big Star	2020	Genome	PRJNA419491	Pinosio et al., 2020	.	.	Prunus_avium_v1.0 (https://www.ncbi.nlm.nih.gov/assembly/GCA_013416215.1/)	.	.	.
Prunus avium	2n =2x = 16	Sweet cherry	Tieton	2020	Genome	.	J. Wang et al., 2020a	.	.	NE-ME-NP-PH (https://www.ncbi.nlm.nih.gov/assembly/GCA_014155035.1/)	.	.	.
Prunus avium	2n =2x = 16	Sweet cherry	Tieton	2020	Genome	PRJNA503752	J. Wang et al., 2020b	.	Prunus avium Tieton Genome v1.0.a1 (https://www.rosaceae.org/analysis/406)	Tieton_10x (https://www.ncbi.nlm.nih.gov/assembly/GCA_012349055.1/)	.	.	.
Prunus davidiana	2n =2x = 16	Chinese wild peach	Zhou Xing Shan Tao 1#	2020	Genome	.	Cao et al., 2020	.	Prunus davidiana Genomne v1.0 (https://www.rosaceae.org/Analysis/8674890)	.	.	.	.
Prunus domestica	2n =6x = 48	European plum	.	2018	Genome	.	.	.	Prunus domestica Draft Genome v1.0.a1 (https://www.rosaceae.org/species/prunus_domestica/genome_v1.0.a1)	.	.	.	.
Prunus dulcis	2n =2x = 16	Almond	Lauranne	2019	Genome	.	Sánchez-Pérez et al., 2019	.	Prunus dulcis Lauranne Genome v1.0 (https://www.rosaceae.org/species/prunus/prunus_dulsis/lauranne/genome_v1.0)	ASM863291v2 (https://www.ncbi.nlm.nih.gov/assembly/GCA_008632915.2/)	.	.	.
Prunus dulcis	2n =2x = 16	Almond	Texas	2019	Genome	.	Alioto et al., 2020	.	Prunus dulcis Texas Genome v2.0 (https://www.rosaceae.org/analysis/295)	ALMONDv2 (https://www.ncbi.nlm.nih.gov/assembly/GCF_902201215.1/)	.	.	https://plants.ensembl.org/Prunus_dulcis/Info/Index
Prunus ferganensis	2n =2x = 16	.	Ka Shi 1#	2020	Genome	.	Cao et al., 2020	.	Prunus ferganensis Genome v1.0 (https://www.rosaceae.org/Analysis/8920960)	.	.	.	.
Prunus kansuensis	2n =2x = 16	.	Hong Gen Gan Su Tao 1#	2020	Genome	.	Cao et al., 2020	.	Prunus kansuensis Genome v1.0 (https://www.rosaceae.org/Analysis/8970984)	.	.	.	.
Prunus mira	2n =2x = 16	.	2010-138	2020	Genome	.	Cao et al., 2020	.	Prunus mira Genome v1.0 (https://www.rosaceae.org/Analysis/8666528)	.	.	.	.
Prunus mume	2n =2x = 16	Japanese apricot	.	2012	Genome	PRJNA172987	Q. Zhang et al., 2012	.	.	P.mume_V1.0 (https://www.ncbi.nlm.nih.gov/assembly/GCF_000346735.1/)	.	.	.
Prunus persica	2n =2x = 16	Peach	Dr. Davis	2011	Genome	.	Ahmad et al., 2011	.	.	PrunusPersicaDD_1.0 (https://www.ncbi.nlm.nih.gov/assembly/GCA_000218175.1/)	.	.	.
Prunus persica	2n =2x = 16	Peach	F8-1,23	2011	Genome	.	Ahmad et al., 2011	.	.	PrunusPersicaF8_1.0 (https://www.ncbi.nlm.nih.gov/assembly/GCA_000218215.1/)	.	.	.
Prunus persica	2n =2x = 16	Peach	Georgia Belle	2011	Genome	.	Ahmad et al., 2011	.	.	PrunusPersicaGB_1.0 (https://www.ncbi.nlm.nih.gov/assembly/GCA_000218195.1/)	.	.	.
Prunus persica	2n =2x = 16	Peach	Lovell doubled haploid	2013	Genome	SRA053230	Verde et al., 2013	.	Prunus persica Genome v1.0 (https://www.rosaceae.org/species/prunus_persica/genome_v1.0)	.	.	.	.
Prunus persica	2n =2x = 16	Peach	Lovell doubled haploid	2017	Genome	.	Verde et al., 2017	http://services.appliedgenomics.org/projects/prunus_persica_v2/prunus_persica_v2/intro/index.html	Prunus persica Genome v2.0.a1 (https://www.rosaceae.org/species/prunus_persica/genome_v2.0.a1)	Prunus_persica_NCBIv2 (https://www.ncbi.nlm.nih.gov/assembly/GCF_000346465.2/)	https://bioinformatics.psb.ugent.be/plaza/versions/plaza_v4_5_dicots/organism/view/Prunus+persica	https://phytozome-next.jgi.doe.gov/info/Ppersica_v2_1	https://plants.ensembl.org/Prunus_persica/Info/Index
Prunus salicina	2n =2x = 16	Japanese plum	Sanyueli	2020	Genome	SRR10235674-SRR10235679	Liu et al., 2020	.	Prunus salicina Sanyueli Genome v1.0 (https://www.rosaceae.org/Analysis/9047161)	SCAU_Psal_1.0 (https://www.ncbi.nlm.nih.gov/assembly/GCA_014863905.1/)	.	.	.
Prunus salicina	2n =2x = 16	Japanese plum	Sanyueli	2020	Genome	.	Fang et al., 2020	.	.	.	.	.	.
Prunus salicina	2n =2x = 16	Japanese plum	Zhongli No. 6	2020	Genome	.	.	.	Prunus salicina Zhongli No. 6 Genome v1.0 (https://www.rosaceae.org/Analysis/9019655)	.	.	.	.
Prunus sibirica	2n =2x = 16	Siberian apricot	.	2014	Transcriptome	SRX339392	S. Dong et al., 2014	.	.	.	.	.	.
Prunus yedoensis var. nudiflora	2n =2x = 16	King cherry	.	2018	Genome	SRP136962	Baek et al., 2018	.	Prunus yedoensis var. nudiflora Genome v1.0 (https://www.rosaceae.org/analysis/289)	Pyn_1.0 (https://www.ncbi.nlm.nih.gov/assembly/GCA_002966975.2), Pyn.v1 (https://www.ncbi.nlm.nih.gov/assembly/GCA_900382725.1)	.	.	.
Prunus yedoensis	2n =2x = 16	Yoshino cherry	Somei-Yoshino	2019	Genome	PRJDB7997	Shirasawa et al., 2019	http://cherry.kazusa.or.jp/	Cerasus x yedoensis Somei-Yoshino Genome v1.0 (https://www.rosaceae.org/species/cerasus_x_yedoensis/genome_v1.0)	CYE_r3.1 (https://www.ncbi.nlm.nih.gov/assembly/GCA_005406145.1/)	.	.	.
Potentilla micrantha	2n = 2x =14	Pink barren strawberry	.	2017	Genome	.	Buti et al., 2018	.	Potentilla micrantha v1.0 (https://www.rosaceae.org/analysis/274)	.	.	.	.
Fragaria x ananassa	2n = 8x =56	Garden strawberry	Reikou	2013	Genome	.	Hirakawa et al., 2014	http://strawberry-garden.kazusa.or.jp	Fragaria x ananassa (FAN_r1.1, FANhybrid_r1.2) (https://www.rosaceae.org/Analysis/500)	FAN_r1.1 (https://www.ncbi.nlm.nih.gov/assembly/GCA_000511835.1/)	.	.	.
Fragaria x ananassa	2n = 8x =56	Garden strawberry	Camarosa	2019	Genome	PRJNA508389	Edger et al., 2019	.	Fragaria x ananassa Camarosa Genome v1.0 (https://www.rosaceae.org/species/fragaria_x_ananassa/genome_v1.0.a1)	.	.	.	.
Fragaria x ananassa	2n = 8x =56	Garden strawberry	Xiaobai and Benihoppe	2019	Transcriptome	PRJNA510223 and PRJNA510532	Yuan et al., 2019	.	.	.	.	.	.
Fragaria x ananassa	2n = 8x =56	Garden strawberry	.	2021	Genome re-annotation	.	T. Liu et al., 2021	http://www.strawberryblast.ml:8080/strawberry/viroblast.php	.	.	.	.	.
Fragaria bucharica	2n = 2x =14	.	.	2013	Genome	.	Hirakawa et al., 2014; Tennessen et al., 2014	http://strawberry-garden.kazusa.or.jp	Fragaria bucharica (FNU_r1.1) (https://www.rosaceae.org/Analysis/500)	FNU_r1.1 (https://www.ncbi.nlm.nih.gov/assembly/GCA_000511995.1/)	.	.	.
Fragaria iinumae	2n = 2x =14	.	.	2013	Genome	.	Hirakawa et al., 2014	http://strawberry-garden.kazusa.or.jp	Fragaria iinumae (FII_r1.1) (https://www.rosaceae.org/Analysis/500)	FII_r1.1 (https://www.ncbi.nlm.nih.gov/assembly/GCA_000511975.1/)	.	.	.
Fragaria iinumae	2n = 2x =14	.	.	2019	Genome	.	Edger et al., 2020	.	Fragaria iinumae Genome v1.0 (https://www.rosaceae.org/species/fragaria_iinumae/genome_v1.0)	FII_1.0 (https://www.ncbi.nlm.nih.gov/assembly/GCA_009720345.1/)	.	.	.
Fragaria nilgerrensis	2n = 2x =14	.	.	2020	Genome	PRJNA592576	J. Zhang et al., 2020	.	Fragaria nilgerrensis Genome v1.0 (https://www.rosaceae.org/bio_data/8666460)	ASM1013465v1 (https://www.ncbi.nlm.nih.gov/assembly/GCA_010134655.1/)	.	.	.
Fragaria nilgerrensis	2n = 2x =14	.	.	2020	Genome	SRR11905577-SRR11905588, and SRR11905595	Feng et al., 2021	.	Fragaria nilgerrensis SCBG Genome v1.0 (https://www.rosaceae.org/Analysis/9097068)	.
Fragaria nipponica	2n = 2x =14	.	.	2013	Genome	.	Hirakawa et al., 2014; Tennessen et al., 2014	http://strawberry-garden.kazusa.or.jp	Fragaria nipponica (FNI_r1.1) (https://www.rosaceae.org/Analysis/500)	FNI_r1.1 (https://www.ncbi.nlm.nih.gov/assembly/GCA_000512025.1/)	.	.	.
Fragaria nubicola	2n = 2x =14	.	.	2020	Genome	SRR11905596-SRR11905602	Feng et al., 2021	.	Fragaria nubicola SCBG Genome v1.0 (https://www.rosaceae.org/Analysis/9155216)	.
Fragaria orientalis	2n = 4x =28	.	.	2013	Genome	.	Hirakawa et al., 2014	http://strawberry-garden.kazusa.or.jp	Fragaria orientalis (FOR_r1.1) (https://www.rosaceae.org/Analysis/500)	FOR_r1.1 (https://www.ncbi.nlm.nih.gov/assembly/GCA_000517285.1/)	.	.	.
Fragaria vesca	2n = 2x =14	Woodland strawberry	Hawaii 4	2010	Genome	SRA026313 and SRA026350	Shulaev et al., 2011	.	Fragaria vesca Genome v1.0 (https://www.rosaceae.org/species/fragaria/fragaria_vesca/genome_v1.0), Fragaria vesca Genome v1.1 (https://www.rosaceae.org/species/fragaria/fragaria_vesca/genome_v1.1)	FraVesHawaii_1.0 (https://www.ncbi.nlm.nih.gov/assembly/GCF_000184155.1/)	https://bioinformatics.psb.ugent.be/plaza/versions/plaza_v4_5_dicots/organism/view/Fragaria+vesca	.	.
Fragaria vesca	2n = 2x =14	Woodland strawberry	.	2015	Genome re-annotation	.	Darwish et al., 2015	http://bioinformatics.towson.edu/strawberry/TowU_Fve_Annotation.aspx	Fragaria vesca Genome v1.1.a2 (https://www.rosaceae.org/species/fragaria_vesca/genome_v1.1.a2)	.	.	.	.
Fragaria vesca	2n = 2x =14	Woodland strawberry	.	2014	Genome re-assembly	.	Tennessen et al., 2014	.	Fragaria vesca Genome v2.0.a1 (https://www.rosaceae.org/species/fragaria_vesca/genome_v2.0.a1)	.	.	https://phytozome-next.jgi.doe.gov/info/Fvesca_v2_0_a2	.
Fragaria vesca	2n = 2x =14	Woodland strawberry	.	2017	Genome re-annotation	.	Y. Li et al., 2018	.	Fragaria vesca Genome v2.0.a2 (https://www.rosaceae.org/species/fragaria_vesca/genome_v2.0.a2)	.	.	https://phytozome-next.jgi.doe.gov/info/Fvesca_v2_0_a2	.
Fragaria vesca	2n = 2x =14	Woodland strawberry	Hawaii 4	2017	Genome	.	Edger et al., 2018	.	Fragaria vesca Genome v4.0.a1 (https://www.rosaceae.org/species/fragaria_vesca/genome_v4.0.a1)	.	.	.	.
Fragaria vesca	2n = 2x =14	Woodland strawberry	.	2019	Genome re-annotation	.	Y. Li et al., 2019	.	Fragaria vesca Genome v4.0.a2 (https://www.rosaceae.org/species/fragaria_vesca/genome_v4.0.a2)	.	.	.	.
Fragaria viridis	2n = 2x =14	.	.	2020	Genome	SRR11905589-SRR11905594	Feng et al., 2021	.	Fragaria viridis SCBG Genome v1.0 (https://www.rosaceae.org/Analysis/9155217)	.
Rosa chinensis	2n = 2x =14	Chinese rose	Old Blush homozygous rose line	2018	Genome	.	Raymond et al., 2018	https://lipm-browsers.toulouse.inra.fr/pub/RchiOBHm-V2/	Rosa chinensis Illumina Genome v1.0 (https://www.rosaceae.org/analysis/288), Rosa chinensis Homozygous Genome v2.0 (https://www.rosaceae.org/analysis/282)	RchiOBHm-V2 (https://www.ncbi.nlm.nih.gov/assembly/GCF_002994745.1/, https://www.ncbi.nlm.nih.gov/assembly/GCA_002994745.2/)	.	.	https://plants.ensembl.org/Rosa_chinensis/Info/Index
Rosa chinensis	2n = 2x =14	Chinese rose	Old Blush doubled haploid	2018	Genome	SRP128461 and SRP133785	Hibrand Saint-Oyant et al., 2018	https://iris.angers.inra.fr/obh/	Rosa chinensis Genome v1.0 (https://www.rosaceae.org/species/rosa/chinensis/genome_v1.0)	.	.	.	.
Rosa damascena	2n = 2x =14	Damask rose	.	2016	Genome	.	.	.	.	ASM166254v1 (https://www.ncbi.nlm.nih.gov/assembly/GCA_001662545.1/)	.	.	.
Rosa lucieae	2n = 2x =14	Memorial rose	.	2019	Genome	.	Debray et al., 2019	.	.	ILVO_Rwic_1.0 (https://www.ncbi.nlm.nih.gov/assembly/GCA_006954505.1/)	.	.	.
Rosa multiflora	2n = 2x =14	Multiflora rose	.	2017	Genome	PRJDB4738	Nakamura et al., 2018	http://rosa.kazusa.or.jp	Rosa multiflora Genome v1.0 (https://www.rosaceae.org/analysis/266)	RMU_r2.0 (https://www.ncbi.nlm.nih.gov/assembly/GCA_002564525.1/)	.	.	.
Geum urbanum	2n = 6x =42	Wood avens	.	2017	Genome	.	Jordan et al., 2018	.	.	G_urb_d1 (https://www.ncbi.nlm.nih.gov/assembly/GCA_900236755.1/)	.	.	.
Rubus idaeus	2n = 2x =14	Red raspberry	Joan J.	2019	Genome	SRP153061	Wight et al., 2019	.	.	.	.	.	.
Rubus occidentalis	2n = 2x =14	Black raspberry	ORUS 4115‐3	2016	Genome	.	VanBuren et al., 2016	.	Rubus occidentalis Genome v1.0.a1 (https://www.rosaceae.org/species/rubus_occidentalis/genome_v1.0.a1)	.	.	.	.
Rubus occidentalis	2n = 2x =14	Black raspberry	ORUS 4115-3	2018	Genome re-assembly	.	Jibran et al., 2018	.	Rubus occidentalis Genome v1.1 (https://www.rosaceae.org/species/rubus_occidentalis/genome_v1.1)	.	.	.	.
Rubus occidentalis	2n = 2x =14	Black raspberry	ORUS 4115-3	2018	Genome	.	VanBuren et al., 2018	.	Rubus occidentalis Genome v3.0 (https://www.rosaceae.org/analysis/268)	.	.	.	.
Purshia tridentata	2n = 2x =18	Bitterbrush	.	2018	Genome	PRJNA374770	Griesmann et al., 2018	.	.	ASM325488v1 (https://www.ncbi.nlm.nih.gov/assembly/GCA_003254885.1/)	.	.	.
Dryas drummondii	2n = 2x =18	Drummond's mountain-avens	.	2018	Genome	PRJNA374770	Griesmann et al., 2018	.	.	ASM325486v1 (https://www.ncbi.nlm.nih.gov/assembly/GCA_003254865.1/)	.	.	.
Table S1 Legend
Entry order is based on the order of genera shown in Figure 2, from Maleae at the top to Dryadeae at the bottom. In each genus, the species are alphabetically ordered. Within the species, different version genomes are chronologically listed.
Different types of genome resources are color-coded. Pink marks genome sequencing papers that usually provide both genome assembly and annotation. Yellow marks genome re-assembly papers. Green highlights genome re-annotation efforts. Blue highlights transcriptome assemblies.
*Note for column G: Many of the studies listed here also produced transcriptomes, which are shown in column G with accession numbers. Some studies created transcriptomes but their data are not accessible and hence not marked in column G.
Reference
Ahmad, R., Parfitt, D. E., Fass, J., Ogundiwin, E., Dhingra, A., Gradziel, T. M., Lin, D., Joshi, N. A., Martinez-Garcia, P. J., & Crisosto, C. H. (2011). Whole genome sequencing of peach (Prunus persica L.) for SNP identification and selection. BMC Genomics, 12(1), 569. https://doi.org/10.1186/1471-2164-12-569
Alioto, T., Alexiou, K. G., Bardil, A., Barteri, F., Castanera, R., Cruz, F., Dhingra, A., Duval, H., Martí, Á. F. i, Frias, L., Galán, B., García, J. L., Howad, W., Gómez‐Garrido, J., Gut, M., Julca, I., Morata, J., Puigdomènech, P., Ribeca, P., … Arús, P. (2020). Transposons played a major role in the diversification between the closely related almond and peach genomes: Results from the almond …
Baek, S., Choi, K., Kim, G.-B., Yu, H.-J., Cho, A., Jang, H., Kim, C., Kim, H.-J., Chang, K. S., Kim, J.-H., & Mun, J.-H. (2018). Draft genome sequence of wild Prunus yedoensis reveals massive inter-specific hybridization between sympatric flowering cherries. Genome Biology, 19(1), 127. https://doi.org/10.1186/s13059-018-1497-y
Bai, Y., Dougherty, L., & Xu, K. (2014). Towards an improved apple reference transcriptome using RNA-seq. Molecular Genetics and Genomics, 289(3), 427–438. https://doi.org/10.1007/s00438-014-0819-3
Buti, M., Moretto, M., Barghini, E., Mascagni, F., Natali, L., Brilli, M., Lomsadze, A., Sonego, P., Giongo, L., Alonge, M., Velasco, R., Varotto, C., Šurbanovski, N., Borodovsky, M., Ward, J. A., Engelen, K., Cavallini, A., Cestaro, A., & Sargent, D. J. (2018). The genome sequence and transcriptome of Potentilla micrantha and their comparison to Fragaria vesca (the woodland strawberry). GigaScie…
Campoy, J. A., Sun, H., Goel, M., Jiao, W.-B. A., Folz-Donahue, K., Kukat, C., Rubio, M., Ruiz, D., Huettel, B., & Schneeberger, K. (2020). Chromosome-level and haplotype-resolved genome assembly enabled by high-throughput single-cell sequencing of gamete genomes. BioRxiv, 2020.04.24.060046. https://doi.org/10.1101/2020.04.24.060046
Cao, K., Peng, Z., Zhao, X., Li, Y., Liu, K., Arus, P., Zhu, G., Deng, S., Fang, W., Chen, C., Wang, X., Wu, J., Fei, Z., & Wang, L. (2020). Pan-genome analyses of peach and its wild relatives provide insights into the genetics of disease resistance and species adaptation. BioRxiv, 2020.07.13.200204. https://doi.org/10.1101/2020.07.13.200204
Chagné, D., Crowhurst, R. N., Pindo, M., Thrimawithana, A., Deng, C., Ireland, H., Fiers, M., Dzierzon, H., Cestaro, A., Fontana, P., Bianco, L., Lu, A., Storey, R., Knäbel, M., Saeed, M., Montanari, S., Kim, Y. K., Nicolini, D., Larger, S., … Velasco, R. (2014). The Draft Genome Sequence of European Pear (Pyrus communis L. ‘Bartlett’). PLOS ONE, 9(4), e92644. https://doi.org/10.1371/journal.pone…
Chen, X., Li, S., Zhang, D., Han, M., Jin, X., Zhao, C., Wang, S., Xing, L., Ma, J., Ji, J., & An, N. (2019). Sequencing of a Wild Apple (Malus baccata) Genome Unravels the Differences Between Cultivated and Wild Apple Species Regarding Disease Resistance and Cold Tolerance. G3: Genes, Genomes, Genetics, 9(7), 2051–2060. https://doi.org/10.1534/g3.119.400245
Daccord, N., Celton, J.-M., Linsmith, G., Becker, C., Choisne, N., Schijlen, E., van de Geest, H., Bianco, L., Micheletti, D., Velasco, R., Di Pierro, E. A., Gouzy, J., Rees, D. J. G., Guérif, P., Muranty, H., Durel, C.-E., Laurens, F., Lespinasse, Y., Gaillard, S., … Bucher, E. (2017). High-quality de novo assembly of the apple genome and methylome dynamics of early fruit development. Nature Gen…
Darwish, O., Shahan, R., Liu, Z., Slovin, J. P., & Alkharouf, N. W. (2015). Re-annotation of the woodland strawberry (Fragaria vesca) genome. BMC Genomics, 16(1), 29. https://doi.org/10.1186/s12864-015-1221-1
Debray, K., Marie-Magdelaine, J., Ruttink, T., Clotault, J., Foucher, F., & Malécot, V. (2019). Identification and assessment of variable single-copy orthologous (SCO) nuclear loci for low-level phylogenomics: A case study in the genus Rosa (Rosaceae). BMC Evolutionary Biology, 19(1), 152. https://doi.org/10.1186/s12862-019-1479-z
Dong, S., Liu, Y., Niu, J., Ning, Y., Lin, S., & Zhang, Z. (2014). De novo transcriptome analysis of the Siberian apricot (Prunus sibirica L.) and search for potential SSR markers by 454 pyrosequencing. Gene, 544(2), 220–227. https://doi.org/10.1016/j.gene.2014.04.031
Dong, X., Wang, Z., Tian, L., Zhang, Y., Qi, D., Huo, H., Xu, J., Li, Z., Liao, R., Shi, M., Wahocho, S. A., Liu, C., Zhang, S., Tian, Z., & Cao, Y. (2020). De novo assembly of a wild pear (Pyrus betuleafolia) genome. Plant Biotechnology Journal, 18(2), 581–595. https://doi.org/10.1111/pbi.13226
Edger, P. P., McKain, M. R., Yocca, A. E., Knapp, S. J., Qiao, Q., & Zhang, T. (2020). Reply to: Revisiting the origin of octoploid strawberry. Nature Genetics, 52(1), 5–7. https://doi.org/10.1038/s41588-019-0544-2
Edger, P. P., Poorten, T. J., VanBuren, R., Hardigan, M. A., Colle, M., McKain, M. R., Smith, R. D., Teresi, S. J., Nelson, A. D. L., Wai, C. M., Alger, E. I., Bird, K. A., Yocca, A. E., Pumplin, N., Ou, S., Ben-Zvi, G., Brodt, A., Baruch, K., Swale, T., … Knapp, S. J. (2019). Origin and evolution of the octoploid strawberry genome. Nature Genetics, 51(3), 541–547. https://doi.org/10.1038/s41588-…
Edger, P. P., VanBuren, R., Colle, M., Poorten, T. J., Wai, C. M., Niederhuth, C. E., Alger, E. I., Ou, S., Acharya, C. B., Wang, J., Callow, P., McKain, M. R., Shi, J., Collier, C., Xiong, Z., Mower, J. P., Slovin, J. P., Hytönen, T., Jiang, N., … Knapp, S. J. (2018). Single-molecule sequencing and optical mapping yields an improved genome of woodland strawberry (Fragaria vesca) with chromosome-…
Fang, Z.-Z., Lin-Wang, K., Dai, H., Zhou, D.-R., Jiang, C.-C., Espley, R. V., Lin, Y.-J., Pan, S.-L., & Ye, X.-F. (2020). The genome of low-chill Chinese plum ‘Sanyueli’ (Prunus salicina Lindl.) provides insights into the regulation of the chilling requirement of flower buds. BioRxiv, 2020.07.31.193243. https://doi.org/10.1101/2020.07.31.193243
Feng, C., Wang, J., Harris, A. J., Folta, K. M., Zhao, M., & Kang, M. (2021). Tracing the Diploid Ancestry of the Cultivated Octoploid Strawberry. Molecular Biology and Evolution, 38(2), 478–485. https://doi.org/10.1093/molbev/msaa238
Griesmann, M., Chang, Y., Liu, X., Song, Y., Haberer, G., Crook, M. B., Billault-Penneteau, B., Lauressergues, D., Keller, J., Imanishi, L., Roswanjaya, Y. P., Kohlen, W., Pujic, P., Battenberg, K., Alloisio, N., Liang, Y., Hilhorst, H., Salgado, M. G., Hocher, V., … Cheng, S. (2018). Phylogenomics reveals multiple losses of nitrogen-fixing root nodule symbiosis. Science, 361(6398). https://doi.o…
Hibrand Saint-Oyant, L., Ruttink, T., Hamama, L., Kirov, I., Lakhwani, D., Zhou, N. N., Bourke, P. M., Daccord, N., Leus, L., Schulz, D., Van de Geest, H., Hesselink, T., Van Laere, K., Debray, K., Balzergue, S., Thouroude, T., Chastellier, A., Jeauffre, J., Voisine, L., … Foucher, F. (2018). A high-quality genome sequence of Rosa chinensis to elucidate ornamental traits. Nature Plants, 4(7), 473…
Hirakawa, H., Shirasawa, K., Kosugi, S., Tashiro, K., Nakayama, S., Yamada, M., Kohara, M., Watanabe, A., Kishida, Y., Fujishiro, T., Tsuruoka, H., Minami, C., Sasamoto, S., Kato, M., Nanri, K., Komaki, A., Yanagi, T., Guoxin, Q., Maeda, F., … Isobe, S. N. (2014). Dissection of the Octoploid Strawberry Genome by Deep Sequencing of the Genomes of Fragaria Species. DNA Research, 21(2), 169–181. htt…
Jiang, F., Zhang, J., Wang, S., Yang, L., Luo, Y., Gao, S., Zhang, M., Wu, S., Hu, S., Sun, H., & Wang, Y. (2019). The apricot ( Prunus armeniaca L.) genome elucidates Rosaceae evolution and beta-carotenoid synthesis. Horticulture Research, 6(1), 1–12. https://doi.org/10.1038/s41438-019-0215-6
Jiang, S., An, H., Xu, F., & Zhang, X. (2020). Chromosome-level genome assembly and annotation of the loquat (Eriobotrya japonica) genome. GigaScience, 9(3). https://doi.org/10.1093/gigascience/giaa015
Jibran, R., Dzierzon, H., Bassil, N., Bushakra, J. M., Edger, P. P., Sullivan, S., Finn, C. E., Dossett, M., Vining, K. J., VanBuren, R., Mockler, T. C., Liachko, I., Davies, K. M., Foster, T. M., & Chagné, D. (2018). Chromosome-scale scaffolding of the black raspberry ( Rubus occidentalis L.) genome based on chromatin interaction data. Horticulture Research, 5(1), 1–11. https://doi.org/10.1038/s…
Jordan, C. Y., Lohse, K., Turner, F., Thomson, M., Gharbi, K., & Ennos, R. A. (2018). Maintaining their genetic distance: Little evidence for introgression between widely hybridizing species of Geum with contrasting mating systems. Molecular Ecology, 27(5), 1214–1228. https://doi.org/10.1111/mec.14426
Koshimizu, S., Nakamura, Y., Nishitani, C., Kobayashi, M., Ohyanagi, H., Yamamoto, T., & Yano, K. (2019). TRANSNAP: A web database providing comprehensive information on Japanese pear transcriptome. Scientific Reports, 9(1), 18922. https://doi.org/10.1038/s41598-019-55287-4
Li, X., Kui, L., Zhang, J., Xie, Y., Wang, L., Yan, Y., Wang, N., Xu, J., Li, C., Wang, W., van Nocker, S., Dong, Y., Ma, F., & Guan, Q. (2016). Improved hybrid de novo genome assembly of domesticated apple (Malus x domestica). GigaScience, 5(1). https://doi.org/10.1186/s13742-016-0139-0
Li, Y., Pi, M., Gao, Q., Liu, Z., & Kang, C. (2019). Updated annotation of the wild strawberry Fragaria vesca V4 genome. Horticulture Research, 6(1), 1–9. https://doi.org/10.1038/s41438-019-0142-6
Li, Y., Wei, W., Feng, J., Luo, H., Pi, M., Liu, Z., & Kang, C. (2018). Genome re-annotation of the wild strawberry Fragaria vesca using extensive Illumina- and SMRT-based RNA-seq datasets. DNA Research, 25(1), 61–70. https://doi.org/10.1093/dnares/dsx038
Linsmith, G., Rombauts, S., Montanari, S., Deng, C. H., Celton, J.-M., Guérif, P., Liu, C., Lohaus, R., Zurn, J. D., Cestaro, A., Bassil, N. V., Bakker, L. V., Schijlen, E., Gardiner, S. E., Lespinasse, Y., Durel, C.-E., Velasco, R., Neale, D. B., Chagné, D., … Bianco, L. (2019). Pseudo-chromosome–length genome assembly of a double haploid “Bartlett” pear (Pyrus communis L.). GigaScience, 8(12). …
Liu, C., Feng, C., Peng, W., Hao, J., Wang, J., Pan, J., & He, Y. (2020). Chromosome-level draft genome of a diploid plum (Prunus salicina). GigaScience, 9(giaa130). https://doi.org/10.1093/gigascience/giaa130
Liu, T., Li, M., Liu, Z., Ai, X., & Li, Y. (2021). Reannotation of the cultivated strawberry genome and establishment of a strawberry genome database. Horticulture Research, 8(1), 1–9. https://doi.org/10.1038/s41438-021-00476-4
Nakamura, N., Hirakawa, H., Sato, S., Otagaki, S., Matsumoto, S., Tabata, S., & Tanaka, Y. (2018). Genome structure of Rosa multiflora, a wild ancestor of cultivated roses. DNA Research, 25(2), 113–121. https://doi.org/10.1093/dnares/dsx042
Ou, C., Wang, F., Wang, J., Li, S., Zhang, Y., Fang, M., Ma, L., Zhao, Y., & Jiang, S. (2019). A de novo genome assembly of the dwarfing pear rootstock Zhongai 1. Scientific Data, 6(1), 281. https://doi.org/10.1038/s41597-019-0291-3
Pinosio, S., Marroni, F., Zuccolo, A., Vitulo, N., Mariette, S., Sonnante, G., Aravanopoulos, F. A., Ganopoulos, I., Palasciano, M., Vidotto, M., Magris, G., Iezzoni, A., Vendramin, G. G., & Morgante, M. (2020). A draft genome of sweet cherry (Prunus avium L.) reveals genome-wide and local effects of domestication. The Plant Journal, 103(4), 1420–1432. https://doi.org/10.1111/tpj.14809
Raymond, O., Gouzy, J., Just, J., Badouin, H., Verdenaud, M., Lemainque, A., Vergne, P., Moja, S., Choisne, N., Pont, C., Carrère, S., Caissard, J.-C., Couloux, A., Cottret, L., Aury, J.-M., Szécsi, J., Latrasse, D., Madoui, M.-A., François, L., … Bendahmane, M. (2018). The Rosa genome provides new insights into the domestication of modern roses. Nature Genetics, 50(6), 772–777. https://doi.org/1…
Sánchez-Pérez, R., Pavan, S., Mazzeo, R., Moldovan, C., Cigliano, R. A., Cueto, J. D., Ricciardi, F., Lotti, C., Ricciardi, L., Dicenta, F., López-Marqués, R. L., & Møller, B. L. (2019). Mutation of a bHLH transcription factor allowed almond domestication. Science, 364(6445), 1095–1098. https://doi.org/10.1126/science.aav8197
Shirasawa, K., Esumi, T., Hirakawa, H., Tanaka, H., Itai, A., Ghelfi, A., Nagasaki, H., & Isobe, S. (2019). Phased genome sequence of an interspecific hybrid flowering cherry, ‘Somei-Yoshino’ (Cerasus × yedoensis). DNA Research, 26(5), 379–389. https://doi.org/10.1093/dnares/dsz016
Shirasawa, K., Isuzugawa, K., Ikenaga, M., Saito, Y., Yamamoto, T., Hirakawa, H., & Isobe, S. (2017). The genome sequence of sweet cherry (Prunus avium) for use in genomics-assisted breeding. DNA Research, 24(5), 499–508. https://doi.org/10.1093/dnares/dsx020
Shulaev, V., Sargent, D. J., Crowhurst, R. N., Mockler, T. C., Folkerts, O., Delcher, A. L., Jaiswal, P., Mockaitis, K., Liston, A., Mane, S. P., Burns, P., Davis, T. M., Slovin, J. P., Bassil, N., Hellens, R. P., Evans, C., Harkins, T., Kodira, C., Desany, B., … Folta, K. M. (2011). The genome of woodland strawberry ( Fragaria vesca ). Nature Genetics, 43(2), 109–116. https://doi.org/10.1038/ng.…
Tennessen, J. A., Govindarajulu, R., Ashman, T.-L., & Liston, A. (2014). Evolutionary Origins and Dynamics of Octoploid Strawberry Subgenomes Revealed by Dense Targeted Capture Linkage Maps. Genome Biology and Evolution, 6(12), 3295–3313. https://doi.org/10.1093/gbe/evu261
VanBuren, R., Bryant, D., Bushakra, J. M., Vining, K. J., Edger, P. P., Rowley, E. R., Priest, H. D., Michael, T. P., Lyons, E., Filichkin, S. A., Dossett, M., Finn, C. E., Bassil, N. V., & Mockler, T. C. (2016). The genome of black raspberry (Rubus occidentalis). The Plant Journal, 87(6), 535–547. https://doi.org/10.1111/tpj.13215
VanBuren, R., Wai, C. M., Colle, M., Wang, J., Sullivan, S., Bushakra, J. M., Liachko, I., Vining, K. J., Dossett, M., Finn, C. E., Jibran, R., Chagné, D., Childs, K., Edger, P. P., Mockler, T. C., & Bassil, N. V. (2018). A near complete, chromosome-scale assembly of the black raspberry (Rubus occidentalis) genome. GigaScience, 7(8). https://doi.org/10.1093/gigascience/giy094
Velasco, R., Zharkikh, A., Affourtit, J., Dhingra, A., Cestaro, A., Kalyanaraman, A., Fontana, P., Bhatnagar, S. K., Troggio, M., Pruss, D., Salvi, S., Pindo, M., Baldi, P., Castelletti, S., Cavaiuolo, M., Coppola, G., Costa, F., Cova, V., Dal Ri, A., … Viola, R. (2010). The genome of the domesticated apple ( Malus × domestica Borkh.). Nature Genetics, 42(10), 833–839. https://doi.org/10.1038/ng.…
Verde, I., Abbott, A. G., Scalabrin, S., Jung, S., Shu, S., Marroni, F., Zhebentyayeva, T., Dettori, M. T., Grimwood, J., Cattonaro, F., Zuccolo, A., Rossini, L., Jenkins, J., Vendramin, E., Meisel, L. A., Decroocq, V., Sosinski, B., Prochnik, S., Mitros, T., … Rokhsar, D. S. (2013). The high-quality draft genome of peach ( Prunus persica ) identifies unique patterns of genetic diversity, domesti…
Verde, I., Jenkins, J., Dondini, L., Micali, S., Pagliarani, G., Vendramin, E., Paris, R., Aramini, V., Gazza, L., Rossini, L., Bassi, D., Troggio, M., Shu, S., Grimwood, J., Tartarini, S., Dettori, M. T., & Schmutz, J. (2017). The Peach v2.0 release: High-resolution linkage mapping and deep resequencing improve chromosome-scale assembly and contiguity. BMC Genomics, 18(1), 225. https://doi.org/1…
Wang, J., Liu, W., Zhu, D., Hong, P., Zhang, S., Xiao, S., Tan, Y., Chen, X., Xu, L., Zong, X., Zhang, L., Wei, H., Yuan, X., & Liu, Q. (2020a). Chromosome-scale genome assembly of sweet cherry ( Prunus avium L.) cv. Tieton obtained using long-read and Hi-C sequencing. Horticulture Research, 7(1), 1–11. https://doi.org/10.1038/s41438-020-00343-8
Wang, J., Liu, W., Zhu, D., Zhou, X., Hong, P., Zhao, H., Tan, Y., Chen, X., Zong, X., Xu, L., Zhang, L., Wei, H., & Liu, Q. (2020b). A de novo assembly of the sweet cherry (Prunus avium cv. Tieton) genome using linked-read sequencing technology. PeerJ, 8, e9114. https://doi.org/10.7717/peerj.9114
Wight, H., Zhou, J., Li, M., Hannenhalli, S., Mount, S. M., & Liu, Z. (2019). Draft Genome Assembly and Annotation of Red Raspberry Rubus Idaeus. BioRxiv, 546135. https://doi.org/10.1101/546135
Wu, J., Wang, Z., Shi, Z., Zhang, S., Ming, R., Zhu, S., Khan, M. A., Tao, S., Korban, S. S., Wang, H., Chen, N. J., Nishio, T., Xu, X., Cong, L., Qi, K., Huang, X., Wang, Y., Zhao, X., Wu, J., … Zhang, S. (2013). The genome of the pear (Pyrus bretschneideri Rehd.). Genome Research, 23(2), 396–408. https://doi.org/10.1101/gr.144311.112
Xue, H., Wang, S., Yao, J.-L., Deng, C. H., Wang, L., Su, Y., Zhang, H., Zhou, H., Sun, M., Li, X., & Yang, J. (2018). Chromosome level high-density integrated genetic maps improve the Pyrus bretschneideri ‘DangshanSuli’ v1.0 genome. BMC Genomics, 19(1), 833. https://doi.org/10.1186/s12864-018-5224-6
Yuan, H., Yu, H., Huang, T., Shen, X., Xia, J., Pang, F., Wang, J., & Zhao, M. (2019). The complexity of the Fragaria x ananassa (octoploid) transcriptome by single-molecule long-read sequencing. Horticulture Research, 6(1), 1–14. https://doi.org/10.1038/s41438-019-0126-6
Zhang, J., Lei, Y., Wang, B., Li, S., Yu, S., Wang, Y., Li, H., Liu, Y., Ma, Y., Dai, H., Wang, J., & Zhang, Z. (2020). The high-quality genome of diploid strawberry (Fragaria nilgerrensis) provides new insights into anthocyanin accumulation. Plant Biotechnology Journal, 18(9), 1908–1924. https://doi.org/10.1111/pbi.13351
Zhang, L., Hu, J., Han, X., Li, J., Gao, Y., Richards, C. M., Zhang, C., Tian, Y., Liu, G., Gul, H., Wang, D., Tian, Y., Yang, C., Meng, M., Yuan, G., Kang, G., Wu, Y., Wang, K., Zhang, H., … Cong, P. (2019). A high-quality apple genome assembly reveals the association of a retrotransposon and red fruit colour. Nature Communications, 10(1), 1494. https://doi.org/10.1038/s41467-019-09518-x
Zhang, Q., Chen, W., Sun, L., Zhao, F., Huang, B., Yang, W., Tao, Y., Wang, J., Yuan, Z., Fan, G., Xing, Z., Han, C., Pan, H., Zhong, X., Shi, W., Liang, X., Du, D., Sun, F., Xu, Z., … Wang, J. (2012). The genome of Prunus mume. Nature Communications, 3(1), 1318. https://doi.org/10.1038/ncomms2290
